# Supplementary material for: Geographical Distribution and Genetic Diversity of Bank Vole Hepaciviruses in Europe
Source: MDPI journal article supplement (doi:10.3390/v13071258), 2021-06-28
Supplement: s1 [file s1]

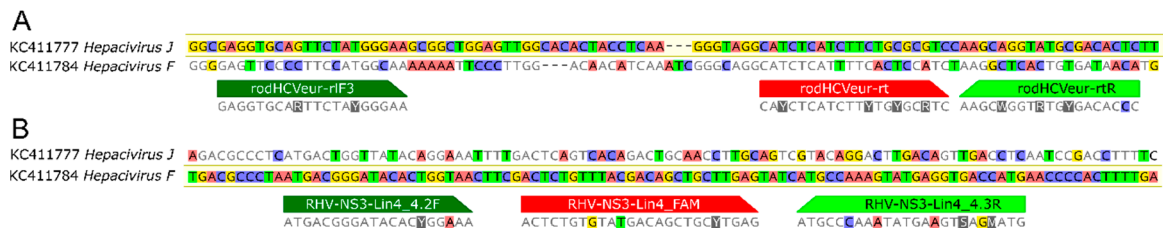

**Figure S1:** Primer and probe sequences of the two RT-qPCR assays rodHCVeur (A) and RHV-NS3-Line4 (B) used for BvHV detection compared to corresponding homologous and heterologous prototype strains of the *Hepacivirus J* and *Hepacivirus F* species. Highlighted are mismatches and ambiguities in comparison to the reference sequence (yellow). Abbreviations: **M**, A or C; **R**, A or G; **S**, G or C; **W**, A or T; **Y**, T or C.

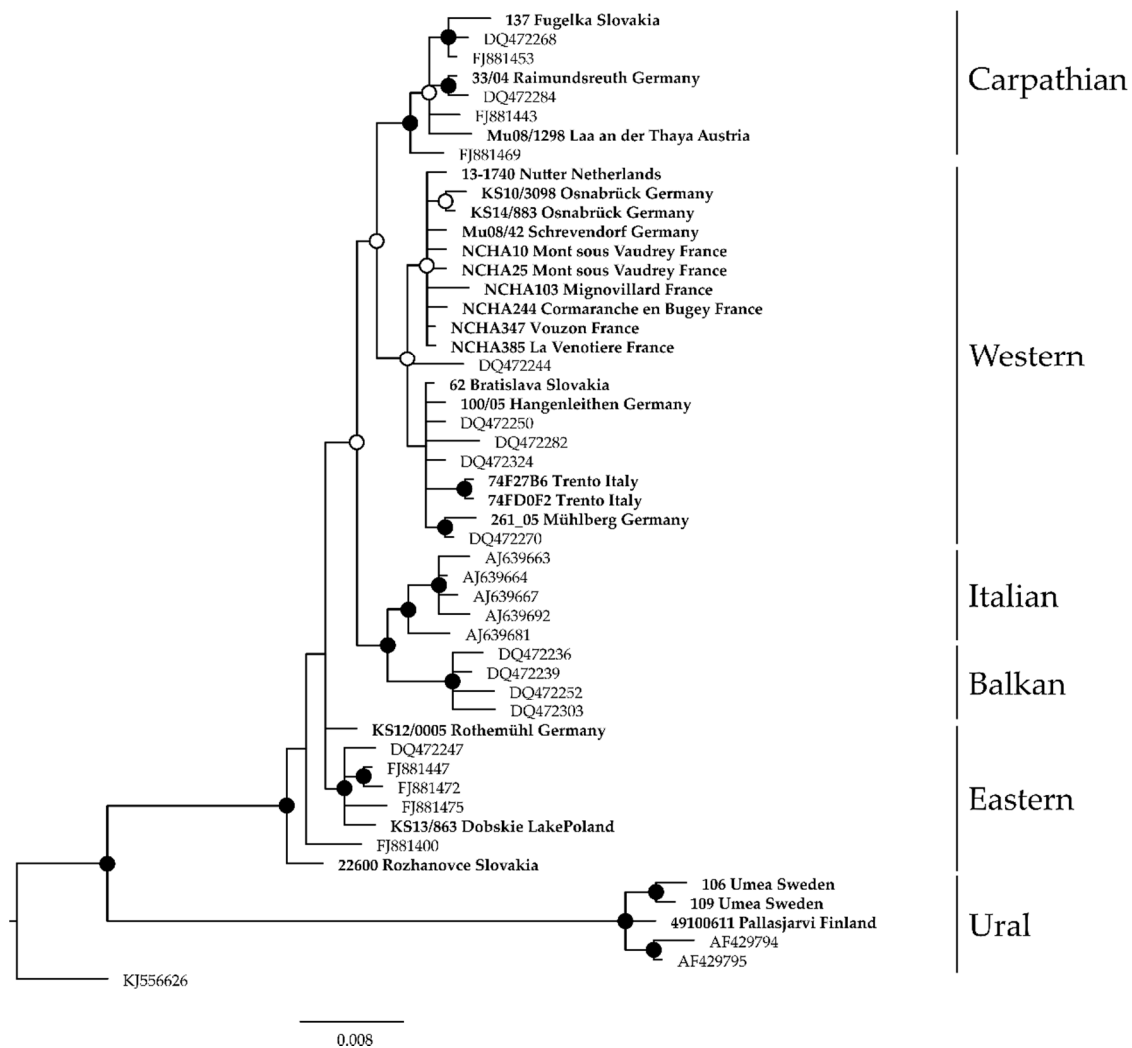

**Figure S2:** Phylogenetic relationships of partial *cyt b* gene sequences (764 nt). Sequences generated during this study are highlighted in bold. Circle colour at nodes indicates posterior Bayesian probabilities: black: probability exceeds 90 %; white: probability exceeds 70 %. Reference sequences obtained from GenBank are indicated by their accession numbers.

**Table S1:** Sequences of primers and probes used in this study.

| Primer                              | Sequence 5'-3'                        | Source     |
|-------------------------------------|---------------------------------------|------------|
| <b>BvHV-Screening</b>               |                                       |            |
| rodHCVeur-rlF3                      | GAG GTG CAR TTC TAY GGGAA             | [1]        |
| rodHCVeur-rtR                       | GGG TGT CRC AYA CCW GCT T             | [1]        |
| rodHCVeur-rt                        | VIC-CAY CTC ATC TTY TGY GCR TC-MGBNFQ | [1]        |
| RHV-NS3-Line4_4.2-F                 | ATG ACG GGA TAC ACY GGA AA            | [2]        |
| RHV-NS3-Line4_4.3-R                 | CAT KGT SAC TTC ATA TTT GGG CAT       | [2]        |
| RHV-NS3-Line4_4-FAM                 | FAM-ACT CTG TGT ATG ACA GCT GCY TGA G | [2]        |
| <b>EGFP-Mix1 – internal Control</b> |                                       |            |
| EGFP-1-F                            | GAC CAC TAC CAG CAG AAC AC            | [3]        |
| EGFP-2-R                            | GAA CTC CAG CAG GAC CAT G             | [3]        |
| EGFP-Probe1                         | HEX-AGC ACC CAGTCC GCC CTG AGC A-BHQ1 | [3]        |
| <b>BvHV-NS3</b>                     |                                       |            |
| rodHV_NS3_932F                      | CGG AAA GAC CAC YAA RGT GCC           | this study |
| rodHV_NS3_1567R                     | AAG TTT CCD GTG TAD CCV GTC AT        | this study |

Abbreviations: **D**, A or G or T; **K**, G or T; **M**, A or C; **R**, A or G; **S**, G or C; **V**, A or C or G; **W**, A or T; **Y**, T or C.

**Table S2:** Semiquantitative genome loads of all BvHV RNA positive animals. *Hepacivirus J* and *Hepacivirus F* were detected by RT-qPCR assay rodHCVeur and RHV-NS3-Line4, respectively.

| Country | Sample ID | Trapping site | Species                 | <i>Hepacivirus J</i> | <i>Hepacivirus F</i> | Bank vole evolutionary lineage |
|---------|-----------|---------------|-------------------------|----------------------|----------------------|--------------------------------|
| Germany | KS10/3254 | Ahlhorn       | <i>Myodes glareolus</i> | +++                  | neg                  | nd                             |
| Germany | KS10/2185 | Billerbeck    | <i>Myodes glareolus</i> | ++++                 | neg                  | nd                             |
| Germany | KS10/2176 | Billerbeck    | <i>Myodes glareolus</i> | +++                  | neg                  | nd                             |
| Germany | KS10/3034 | Billerbeck    | <i>Myodes glareolus</i> | +++                  | neg                  | nd                             |
| Germany | KS10/2094 | Billerbeck    | <i>Myodes glareolus</i> | +++                  | neg                  | nd                             |
| Germany | KS10/2197 | Billerbeck    | <i>Myodes glareolus</i> | +++                  | neg                  | nd                             |
| Germany | KS10/2234 | Billerbeck    | <i>Myodes glareolus</i> | +++                  | neg                  | nd                             |
| Germany | KS10/2709 | Billerbeck    | <i>Myodes glareolus</i> | +++                  | neg                  | nd                             |
| Germany | KS10/2688 | Billerbeck    | <i>Myodes glareolus</i> | +++                  | neg                  | nd                             |
| Germany | KS10/2202 | Billerbeck    | <i>Myodes glareolus</i> | +++                  | neg                  | nd                             |
| Germany | KS10/3022 | Billerbeck    | <i>Myodes glareolus</i> | +++                  | neg                  | nd                             |
| Germany | KS10/2160 | Billerbeck    | <i>Myodes glareolus</i> | +++                  | neg                  | nd                             |
| Germany | KS10/2236 | Billerbeck    | <i>Myodes glareolus</i> | +++                  | neg                  | nd                             |
| Germany | KS10/2214 | Billerbeck    | <i>Myodes glareolus</i> | +++                  | neg                  | nd                             |
| Germany | KS10/2172 | Billerbeck    | <i>Myodes glareolus</i> | +++                  | neg                  | nd                             |
| Germany | KS10/2045 | Billerbeck    | <i>Myodes glareolus</i> | +++                  | neg                  | nd                             |
| Germany | KS10/2099 | Billerbeck    | <i>Myodes glareolus</i> | +++                  | neg                  | nd                             |
| Germany | KS10/1976 | Billerbeck    | <i>Myodes glareolus</i> | +++                  | neg                  | nd                             |
| Germany | KS10/2015 | Billerbeck    | <i>Myodes glareolus</i> | +++                  | neg                  | nd                             |
| Germany | KS11/2240 | Billerbeck    | <i>Myodes glareolus</i> | +++                  | neg                  | nd                             |
| Germany | KS11/1250 | Billerbeck    | <i>Myodes glareolus</i> | +++                  | neg                  | nd                             |
| Germany | KS10/2677 | Billerbeck    | <i>Myodes glareolus</i> | +++                  | neg                  | nd                             |
| Germany | KS10/2609 | Billerbeck    | <i>Myodes glareolus</i> | +++                  | neg                  | nd                             |
| Germany | KS10/2035 | Billerbeck    | <i>Myodes glareolus</i> | +++                  | neg                  | nd                             |
| Germany | KS11/2251 | Billerbeck    | <i>Myodes glareolus</i> | +++                  | neg                  | nd                             |
| Germany | KS10/2195 | Billerbeck    | <i>Myodes glareolus</i> | +++                  | neg                  | nd                             |
| Germany | KS10/2002 | Billerbeck    | <i>Myodes glareolus</i> | +++                  | neg                  | nd                             |
| Germany | KS11/1922 | Billerbeck    | <i>Myodes glareolus</i> | +++                  | neg                  | nd                             |
| Germany | KS10/2660 | Billerbeck    | <i>Myodes glareolus</i> | +++                  | neg                  | nd                             |
| Germany | KS10/2701 | Billerbeck    | <i>Myodes glareolus</i> | +++                  | neg                  | nd                             |
| Germany | KS10/2027 | Billerbeck    | <i>Myodes glareolus</i> | +++                  | neg                  | nd                             |
| Germany | KS10/2186 | Billerbeck    | <i>Myodes glareolus</i> | +++                  | neg                  | nd                             |
| Germany | KS11/2233 | Billerbeck    | <i>Myodes glareolus</i> | +++                  | neg                  | nd                             |
| Germany | KS10/2710 | Billerbeck    | <i>Myodes glareolus</i> | ++                   | neg                  | nd                             |
| Germany | KS10/1973 | Billerbeck    | <i>Myodes glareolus</i> | ++                   | neg                  | nd                             |
| Germany | KS10/2239 | Billerbeck    | <i>Myodes glareolus</i> | ++                   | neg                  | nd                             |
| Germany | KS10/2000 | Billerbeck    | <i>Myodes glareolus</i> | ++                   | neg                  | nd                             |
| Germany | KS10/2225 | Billerbeck    | <i>Myodes glareolus</i> | ++                   | neg                  | nd                             |
| Germany | KS10/2625 | Billerbeck    | <i>Myodes glareolus</i> | ++                   | neg                  | nd                             |
| Germany | KS10/2012 | Billerbeck    | <i>Myodes glareolus</i> | ++                   | neg                  | nd                             |
| Germany | KS10/2184 | Billerbeck    | <i>Myodes glareolus</i> | ++                   | neg                  | nd                             |
| Germany | KS10/2685 | Billerbeck    | <i>Myodes glareolus</i> | ++                   | neg                  | nd                             |
| Germany | KS10/2175 | Billerbeck    | <i>Myodes glareolus</i> | ++                   | neg                  | nd                             |
| Germany | KS10/2689 | Billerbeck    | <i>Myodes glareolus</i> | ++                   | neg                  | nd                             |
| Germany | KS11/1925 | Billerbeck    | <i>Myodes glareolus</i> | ++                   | neg                  | nd                             |
| Germany | KS10/2657 | Billerbeck    | <i>Myodes glareolus</i> | ++                   | neg                  | nd                             |
| Germany | KS10/1977 | Billerbeck    | <i>Myodes glareolus</i> | ++                   | neg                  | nd                             |
| Germany | KS10/2673 | Billerbeck    | <i>Myodes glareolus</i> | ++                   | neg                  | nd                             |
| Germany | KS10/1970 | Billerbeck    | <i>Myodes glareolus</i> | ++                   | neg                  | nd                             |
| Germany | KS10/2009 | Billerbeck    | <i>Myodes glareolus</i> | ++                   | neg                  | nd                             |
| Germany | KS10/2026 | Billerbeck    | <i>Myodes glareolus</i> | ++                   | neg                  | nd                             |
| Germany | KS10/2010 | Billerbeck    | <i>Myodes glareolus</i> | ++                   | neg                  | nd                             |
| Germany | KS10/2245 | Billerbeck    | <i>Myodes glareolus</i> | ++                   | neg                  | nd                             |
| Germany | KS10/2696 | Billerbeck    | <i>Myodes glareolus</i> | ++                   | neg                  | nd                             |
| Germany | KS10/2714 | Billerbeck    | <i>Myodes glareolus</i> | ++                   | neg                  | nd                             |
| Germany | KS10/2023 | Billerbeck    | <i>Myodes glareolus</i> | ++                   | neg                  | nd                             |
| Germany | KS10/1994 | Billerbeck    | <i>Myodes glareolus</i> | ++                   | neg                  | nd                             |
| Germany | KS10/2693 | Billerbeck    | <i>Myodes glareolus</i> | ++                   | neg                  | nd                             |
| Germany | KS10/2240 | Billerbeck    | <i>Myodes glareolus</i> | +                    | neg                  | nd                             |
| Germany | KS10/2033 | Billerbeck    | <i>Myodes glareolus</i> | +                    | neg                  | nd                             |
| Germany | KS10/2705 | Billerbeck    | <i>Myodes glareolus</i> | +                    | neg                  | nd                             |
| Germany | KS10/2237 | Billerbeck    | <i>Myodes glareolus</i> | +                    | neg                  | nd                             |
| Germany | KS11/1910 | Billerbeck    | <i>Myodes glareolus</i> | +                    | neg                  | nd                             |
| Germany | KS10/2204 | Billerbeck    | <i>Myodes glareolus</i> | +                    | neg                  | nd                             |
| Germany | KS10/1999 | Billerbeck    | <i>Myodes glareolus</i> | +                    | neg                  | nd                             |
| Germany | KS12/1778 | Billerbeck    | <i>Myodes glareolus</i> | +++                  | neg                  | nd                             |

|         |           |             |                         |      |      |    |
|---------|-----------|-------------|-------------------------|------|------|----|
| Germany | KS12/1821 | Billerbeck  | <i>Myodes glareolus</i> | ++   | neg  | nd |
| Germany | KS12/1794 | Billerbeck  | <i>Myodes glareolus</i> | +++  | neg  | nd |
| Germany | KS10/2219 | Billerbeck  | <i>Myodes glareolus</i> | neg  | ++++ | nd |
| Germany | KS10/2173 | Billerbeck  | <i>Myodes glareolus</i> | neg  | ++++ | nd |
| Germany | KS10/2180 | Billerbeck  | <i>Myodes glareolus</i> | neg  | ++++ | nd |
| Germany | KS10/2104 | Billerbeck  | <i>Myodes glareolus</i> | neg  | +++  | nd |
| Germany | KS10/2167 | Billerbeck  | <i>Myodes glareolus</i> | neg  | +++  | nd |
| Germany | KS10/2179 | Billerbeck  | <i>Myodes glareolus</i> | neg  | +++  | nd |
| Germany | KS10/2101 | Billerbeck  | <i>Myodes glareolus</i> | neg  | ++   | nd |
| Germany | KS10/2100 | Billerbeck  | <i>Myodes glareolus</i> | neg  | ++   | nd |
| Germany | BH6       | Bremerhaven | <i>Myodes glareolus</i> | ++++ | neg  | nd |
| Germany | BH17      | Bremerhaven | <i>Myodes glareolus</i> | +++  | neg  | nd |
| Germany | BH9       | Bremerhaven | <i>Myodes glareolus</i> | +++  | neg  | nd |
| Germany | 41/04     | Falkenstein | <i>Myodes glareolus</i> | neg  | ++++ | nd |
| Germany | 36/04     | Falkenstein | <i>Myodes glareolus</i> | neg  | ++++ | nd |
| Germany | KS11/1113 | Gotha       | <i>Myodes glareolus</i> | ++++ | ++++ | nd |
| Germany | KS10/1602 | Gotha       | <i>Myodes glareolus</i> | ++++ | neg  | nd |
| Germany | KS11/2126 | Gotha       | <i>Myodes glareolus</i> | ++++ | ++++ | nd |
| Germany | KS11/1894 | Gotha       | <i>Myodes glareolus</i> | ++++ | ++++ | nd |
| Germany | KS11/0274 | Gotha       | <i>Myodes glareolus</i> | ++++ | ++++ | nd |
| Germany | KS12/1397 | Gotha       | <i>Myodes glareolus</i> | ++++ | ++++ | nd |
| Germany | KS11/2105 | Gotha       | <i>Myodes glareolus</i> | +++  | ++++ | nd |
| Germany | KS11/1880 | Gotha       | <i>Myodes glareolus</i> | +++  | ++++ | nd |
| Germany | KS12/1386 | Gotha       | <i>Myodes glareolus</i> | +++  | ++++ | nd |
| Germany | KS11/2100 | Gotha       | <i>Myodes glareolus</i> | +++  | ++++ | nd |
| Germany | KS11/0221 | Gotha       | <i>Myodes glareolus</i> | +++  | ++++ | nd |
| Germany | KS11/2088 | Gotha       | <i>Myodes glareolus</i> | +++  | ++++ | nd |
| Germany | KS11/1891 | Gotha       | <i>Myodes glareolus</i> | +++  | ++++ | nd |
| Germany | KS11/0235 | Gotha       | <i>Myodes glareolus</i> | +++  | +++  | nd |
| Germany | KS11/2089 | Gotha       | <i>Myodes glareolus</i> | +++  | ++++ | nd |
| Germany | KS11/0211 | Gotha       | <i>Myodes glareolus</i> | +++  | neg  | nd |
| Germany | KS11/2134 | Gotha       | <i>Myodes glareolus</i> | +++  | ++++ | nd |
| Germany | KS10/1486 | Gotha       | <i>Myodes glareolus</i> | +++  | +++  | nd |
| Germany | KS11/1096 | Gotha       | <i>Myodes glareolus</i> | +++  | ++++ | nd |
| Germany | KS10/1580 | Gotha       | <i>Myodes glareolus</i> | +++  | ++++ | nd |
| Germany | KS11/2133 | Gotha       | <i>Myodes glareolus</i> | +++  | ++++ | nd |
| Germany | KS11/0203 | Gotha       | <i>Myodes glareolus</i> | +++  | +++  | nd |
| Germany | KS11/1897 | Gotha       | <i>Myodes glareolus</i> | +++  | ++++ | nd |
| Germany | KS11/2097 | Gotha       | <i>Myodes glareolus</i> | +++  | ++++ | nd |
| Germany | KS10/2789 | Gotha       | <i>Myodes glareolus</i> | +++  | +++  | nd |
| Germany | KS10/1481 | Gotha       | <i>Myodes glareolus</i> | +++  | ++++ | nd |
| Germany | KS11/1881 | Gotha       | <i>Myodes glareolus</i> | +++  | ++++ | nd |
| Germany | KS11/0276 | Gotha       | <i>Myodes glareolus</i> | +++  | +++  | nd |
| Germany | KS11/1104 | Gotha       | <i>Myodes glareolus</i> | +++  | ++++ | nd |
| Germany | KS10/1576 | Gotha       | <i>Myodes glareolus</i> | +++  | +++  | nd |
| Germany | KS10/1482 | Gotha       | <i>Myodes glareolus</i> | +++  | ++++ | nd |
| Germany | KS10/2717 | Gotha       | <i>Myodes glareolus</i> | +++  | ++++ | nd |
| Germany | KS11/0223 | Gotha       | <i>Myodes glareolus</i> | +++  | +++  | nd |
| Germany | KS11/1892 | Gotha       | <i>Myodes glareolus</i> | +++  | +++  | nd |
| Germany | KS11/2127 | Gotha       | <i>Myodes glareolus</i> | +++  | ++++ | nd |
| Germany | KS11/1889 | Gotha       | <i>Myodes glareolus</i> | +++  | ++++ | nd |
| Germany | KS12/1388 | Gotha       | <i>Myodes glareolus</i> | +++  | ++++ | nd |
| Germany | KS10/2763 | Gotha       | <i>Myodes glareolus</i> | +++  | ++++ | nd |
| Germany | KS10/2968 | Gotha       | <i>Myodes glareolus</i> | +++  | neg  | nd |
| Germany | KS11/0121 | Gotha       | <i>Myodes glareolus</i> | ++   | +++  | nd |
| Germany | KS10/1575 | Gotha       | <i>Myodes glareolus</i> | ++   | +++  | nd |
| Germany | KS11/1902 | Gotha       | <i>Myodes glareolus</i> | ++   | ++++ | nd |
| Germany | KS11/1869 | Gotha       | <i>Myodes glareolus</i> | ++   | ++++ | nd |
| Germany | KS12/1401 | Gotha       | <i>Myodes glareolus</i> | ++   | ++++ | nd |
| Germany | KS11/1903 | Gotha       | <i>Myodes glareolus</i> | ++   | +++  | nd |
| Germany | KS11/0281 | Gotha       | <i>Myodes glareolus</i> | ++   | ++   | nd |
| Germany | KS10/2736 | Gotha       | <i>Myodes glareolus</i> | ++   | ++   | nd |
| Germany | KS11/0253 | Gotha       | <i>Myodes glareolus</i> | ++   | ++   | nd |
| Germany | KS10/2722 | Gotha       | <i>Myodes glareolus</i> | +    | neg  | nd |
| Germany | KS12/1405 | Gotha       | <i>Myodes glareolus</i> | +    | ++   | nd |
| Germany | KS12/1396 | Gotha       | <i>Myodes glareolus</i> | +    | ++   | nd |
| Germany | KS12/1399 | Gotha       | <i>Myodes glareolus</i> | +    | +    | nd |
| Germany | KS10/1579 | Gotha       | <i>Myodes glareolus</i> | +    | neg  | nd |
| Germany | KS12/1385 | Gotha       | <i>Myodes glareolus</i> | ++++ | ++++ | nd |
| Germany | KS12/1379 | Gotha       | <i>Myodes glareolus</i> | +++  | ++++ | nd |
| Germany | KS12/1398 | Gotha       | <i>Myodes glareolus</i> | +++  | ++++ | nd |
| Germany | KS10/2958 | Gotha       | <i>Myodes glareolus</i> | neg  | ++++ | nd |
| Germany | KS11/2149 | Gotha       | <i>Myodes glareolus</i> | neg  | ++++ | nd |

|         |           |                         |                         |      |      |         |
|---------|-----------|-------------------------|-------------------------|------|------|---------|
| Germany | KS10/2972 | Gotha                   | <i>Myodes glareolus</i> | neg  | +++  | nd      |
| Germany | KS10/2978 | Gotha                   | <i>Myodes glareolus</i> | neg  | +++  | nd      |
| Germany | KS10/1587 | Gotha                   | <i>Myodes glareolus</i> | neg  | +++  | nd      |
| Germany | KS10/1595 | Gotha                   | <i>Myodes glareolus</i> | neg  | +++  | nd      |
| Germany | KS10/2806 | Gotha                   | <i>Myodes glareolus</i> | neg  | +++  | nd      |
| Germany | KS10/1604 | Gotha                   | <i>Myodes glareolus</i> | neg  | ++   | nd      |
| Germany | KS12/1393 | Gotha                   | <i>Myodes glareolus</i> | neg  | ++   | nd      |
| Germany | KS10/1581 | Gotha                   | <i>Myodes glareolus</i> | neg  | +    | nd      |
| Germany | 20/04     | Hangenleithen           | <i>Myodes glareolus</i> | neg  | ++++ | nd      |
| Germany | 100/05    | Hangenleithen           | <i>Myodes glareolus</i> | neg  | ++++ | Western |
| Germany | 14/04     | Hangenleithen           | <i>Myodes glareolus</i> | neg  | ++++ | nd      |
| Germany | KS12/0192 | Jasnitz                 | <i>Myodes glareolus</i> | +++  | neg  | nd      |
| Germany | KS12/0195 | Jasnitz                 | <i>Myodes glareolus</i> | ++   | neg  | nd      |
| Germany | KS12/0206 | Jasnitz                 | <i>Myodes glareolus</i> | ++   | neg  | nd      |
| Germany | KS12/0247 | Jasnitz                 | <i>Myodes glareolus</i> | +    | neg  | nd      |
| Germany | KS12/0196 | Jasnitz                 | <i>Myodes glareolus</i> | +    | neg  | nd      |
| Germany | KS10/2446 | Jeeser                  | <i>Myodes glareolus</i> | ++++ | neg  | nd      |
| Germany | KS11/2175 | Jeeser                  | <i>Myodes glareolus</i> | +++  | neg  | nd      |
| Germany | KS12/1426 | Jeeser                  | <i>Myodes glareolus</i> | +++  | +    | nd      |
| Germany | KS11/2183 | Jeeser                  | <i>Myodes glareolus</i> | +++  | neg  | nd      |
| Germany | KS10/3652 | Jeeser                  | <i>Myodes glareolus</i> | +++  | neg  | nd      |
| Germany | KS11/2158 | Jeeser                  | <i>Myodes glareolus</i> | +++  | neg  | nd      |
| Germany | KS11/2157 | Jeeser                  | <i>Myodes glareolus</i> | +++  | neg  | nd      |
| Germany | KS11/2170 | Jeeser                  | <i>Myodes glareolus</i> | +++  | neg  | nd      |
| Germany | KS11/0004 | Jeeser                  | <i>Myodes glareolus</i> | +++  | neg  | nd      |
| Germany | KS10/3632 | Jeeser                  | <i>Myodes glareolus</i> | +++  | neg  | nd      |
| Germany | KS10/3623 | Jeeser                  | <i>Myodes glareolus</i> | +++  | neg  | nd      |
| Germany | KS10/3628 | Jeeser                  | <i>Myodes glareolus</i> | +++  | neg  | nd      |
| Germany | KS10/1445 | Jeeser                  | <i>Myodes glareolus</i> | +++  | neg  | nd      |
| Germany | KS11/0005 | Jeeser                  | <i>Myodes glareolus</i> | ++   | neg  | nd      |
| Germany | KS10/3618 | Jeeser                  | <i>Myodes glareolus</i> | ++   | neg  | nd      |
| Germany | KS10/3601 | Jeeser                  | <i>Myodes glareolus</i> | ++   | neg  | nd      |
| Germany | KS11/2192 | Jeeser                  | <i>Myodes glareolus</i> | ++   | neg  | nd      |
| Germany | KS10/1455 | Jeeser                  | <i>Myodes glareolus</i> | ++   | neg  | nd      |
| Germany | KS10/2368 | Jeeser                  | <i>Myodes glareolus</i> | ++   | neg  | nd      |
| Germany | KS10/1448 | Jeeser                  | <i>Myodes glareolus</i> | ++   | ++++ | nd      |
| Germany | KS11/0015 | Jeeser                  | <i>Myodes glareolus</i> | ++   | neg  | nd      |
| Germany | KS10/3611 | Jeeser                  | <i>Myodes glareolus</i> | ++   | neg  | nd      |
| Germany | KS10/2325 | Jeeser                  | <i>Myodes glareolus</i> | ++   | neg  | nd      |
| Germany | KS11/2159 | Jeeser                  | <i>Myodes glareolus</i> | ++   | neg  | nd      |
| Germany | KS11/2196 | Jeeser                  | <i>Myodes glareolus</i> | ++   | neg  | nd      |
| Germany | KS10/1454 | Jeeser                  | <i>Myodes glareolus</i> | ++   | neg  | nd      |
| Germany | KS10/2401 | Jeeser                  | <i>Myodes glareolus</i> | ++   | neg  | nd      |
| Germany | KS10/1452 | Jeeser                  | <i>Myodes glareolus</i> | ++   | neg  | nd      |
| Germany | KS11/2172 | Jeeser                  | <i>Myodes glareolus</i> | ++   | neg  | nd      |
| Germany | KS10/2334 | Jeeser                  | <i>Myodes glareolus</i> | ++   | neg  | nd      |
| Germany | KS10/2403 | Jeeser                  | <i>Myodes glareolus</i> | +    | neg  | nd      |
| Germany | KS10/2414 | Jeeser                  | <i>Myodes glareolus</i> | +    | neg  | nd      |
| Germany | KS10/2408 | Jeeser                  | <i>Myodes glareolus</i> | +    | neg  | nd      |
| Germany | KS10/3604 | Jeeser                  | <i>Myodes glareolus</i> | +    | neg  | nd      |
| Germany | KS10/3588 | Jeeser                  | <i>Myodes glareolus</i> | +    | neg  | nd      |
| Germany | KS10/3610 | Jeeser                  | <i>Myodes glareolus</i> | +    | neg  | nd      |
| Germany | KS12/1435 | Jeeser                  | <i>Myodes glareolus</i> | ++++ | neg  | nd      |
| Germany | KS12/1432 | Jeeser                  | <i>Myodes glareolus</i> | +++  | neg  | nd      |
| Germany | KS12/1422 | Jeeser                  | <i>Myodes glareolus</i> | +++  | neg  | nd      |
| Germany | KS12/1412 | Jeeser                  | <i>Myodes glareolus</i> | ++   | neg  | nd      |
| Germany | KS12/1436 | Jeeser                  | <i>Myodes glareolus</i> | ++   | neg  | nd      |
| Germany | KS14/0026 | Jeeser                  | <i>Myodes glareolus</i> | neg  | ++++ | nd      |
| Germany | KS11/2631 | Lucka (bei Groitzsch)   | <i>Myodes glareolus</i> | +++  | neg  | nd      |
| Germany | KS11/2632 | Lucka (bei Groitzsch)   | <i>Myodes glareolus</i> | ++   | neg  | nd      |
| Germany | KS11/2613 | Lucka (bei Groitzsch)   | <i>Myodes glareolus</i> | +    | neg  | nd      |
| Germany | KS11/2573 | Lucka (bei Groitzsch)   | <i>Myodes glareolus</i> | neg  | +++  | nd      |
| Germany | 261/05    | Mühlberg, Spiegelau     | <i>Myodes glareolus</i> | neg  | ++++ | Western |
| Germany | 10/04     | Mutzenwinkel            | <i>Myodes glareolus</i> | neg  | ++++ | nd      |
| Germany | KS10/3049 | Oberndorf (bei Hemmoor) | <i>Myodes glareolus</i> | neg  | +++  | nd      |
| Germany | KS10/3039 | Oberndorf (bei Hemmoor) | <i>Myodes glareolus</i> | neg  | +++  | nd      |
| Germany | KS14/833  | Osnabrück               | <i>Myodes glareolus</i> | ++++ | ++++ | Western |
| Germany | KS11/2665 | Osnabrück               | <i>Myodes glareolus</i> | ++++ | +++  | nd      |
| Germany | KS11/2670 | Osnabrück               | <i>Myodes glareolus</i> | ++++ | ++   | nd      |
| Germany | KS11/2668 | Osnabrück               | <i>Myodes glareolus</i> | ++++ | neg  | nd      |
| Germany | KS11/2644 | Osnabrück               | <i>Myodes glareolus</i> | ++++ | neg  | nd      |
| Germany | KS10/3089 | Osnabrück               | <i>Myodes glareolus</i> | ++++ | neg  | nd      |
| Germany | KS11/2669 | Osnabrück               | <i>Myodes glareolus</i> | +++  | neg  | nd      |

|         |            |                  |                         |      |      |            |
|---------|------------|------------------|-------------------------|------|------|------------|
| Germany | KS10/3117  | Osnabrück        | <i>Myodes glareolus</i> | +++  | neg  | nd         |
| Germany | KS11/2680  | Osnabrück        | <i>Myodes glareolus</i> | +++  | neg  | nd         |
| Germany | KS10/3098  | Osnabrück        | <i>Myodes glareolus</i> | +++  | ++++ | Western    |
| Germany | KS10/3119  | Osnabrück        | <i>Myodes glareolus</i> | ++   | neg  | nd         |
| Germany | KS10/3160  | Osnabrück        | <i>Myodes glareolus</i> | neg  | ++   | nd         |
| Germany | KS14/766   | Osnabrück        | <i>Myodes glareolus</i> | neg  | ++++ | nd         |
| Germany | KS14/778   | Osnabrück        | <i>Myodes glareolus</i> | neg  | ++++ | nd         |
| Germany | KS14/724   | Osnabrück        | <i>Myodes glareolus</i> | neg  | ++++ | nd         |
| Germany | 33/04      | Raimundsreuth    | <i>Myodes glareolus</i> | neg  | ++++ | Carpathian |
| Germany | 26/04      | Raimundsreuth    | <i>Myodes glareolus</i> | neg  | ++++ | nd         |
| Germany | 29/04      | Raimundsreuth    | <i>Myodes glareolus</i> | neg  | (+)  | nd         |
| Germany | KS12/05    | Rothemühl        | <i>Myodes glareolus</i> | neg  | ++++ | Eastern    |
| Germany | KS12/02    | Rothemühl        | <i>Myodes glareolus</i> | neg  | ++++ | nd         |
| Germany | Mu/08/0042 | Schreivendorf    | <i>Myodes glareolus</i> | ++++ | neg  | Western    |
| Germany | Mu/08/0036 | Schreivendorf    | <i>Myodes glareolus</i> | ++++ | neg  | nd         |
| Germany | Mu/08/0058 | Schreivendorf    | <i>Myodes glareolus</i> | +++  | neg  | nd         |
| Germany | Mu/08/0040 | Schreivendorf    | <i>Myodes glareolus</i> | +++  | neg  | nd         |
| Germany | Mu/08/0041 | Schreivendorf    | <i>Myodes glareolus</i> | +++  | neg  | nd         |
| Germany | Mu/08/0051 | Schreivendorf    | <i>Myodes glareolus</i> | +++  | neg  | nd         |
| Germany | Mu/08/0054 | Schreivendorf    | <i>Myodes glareolus</i> | ++++ | neg  | nd         |
| Germany | Mu/08/0053 | Schreivendorf    | <i>Myodes glareolus</i> | +++  | neg  | nd         |
| Germany | Mu/08/0044 | Schreivendorf    | <i>Myodes glareolus</i> | +++  | neg  | nd         |
| Germany | Mu/08/0045 | Schreivendorf    | <i>Myodes glareolus</i> | neg  | +++  | nd         |
| Germany | Mu/08/0037 | Schreivendorf    | <i>Myodes glareolus</i> | neg  | ++   | nd         |
| Germany | TM148      | Tussenhausen     | <i>Myodes glareolus</i> | neg  | ++++ | nd         |
| Germany | TM154      | Tussenhausen     | <i>Myodes glareolus</i> | neg  | ++++ | nd         |
| Germany | TM151      | Tussenhausen     | <i>Myodes glareolus</i> | neg  | ++++ | nd         |
| Germany | TM149      | Tussenhausen     | <i>Myodes glareolus</i> | neg  | +    | nd         |
| Germany | KS11/1962  | Weissach         | <i>Myodes glareolus</i> | +++  | neg  | nd         |
| Germany | KS10/1056  | Weissach         | <i>Myodes glareolus</i> | +++  | neg  | nd         |
| Germany | KS11/1973  | Weissach         | <i>Myodes glareolus</i> | +++  | neg  | nd         |
| Germany | KS11/2026  | Weissach         | <i>Myodes glareolus</i> | +++  | neg  | nd         |
| Germany | KS10/1098  | Weissach         | <i>Myodes glareolus</i> | +++  | neg  | nd         |
| Germany | KS10/1906  | Weissach         | <i>Myodes glareolus</i> | ++   | neg  | nd         |
| Germany | KS11/1971  | Weissach         | <i>Myodes glareolus</i> | ++   | neg  | nd         |
| Germany | KS10/3478  | Weissach         | <i>Myodes glareolus</i> | ++   | neg  | nd         |
| Germany | KS11/1981  | Weissach         | <i>Myodes glareolus</i> | ++   | neg  | nd         |
| Germany | KS10/3455  | Weissach         | <i>Myodes glareolus</i> | ++   | neg  | nd         |
| Germany | KS10/1871  | Weissach         | <i>Myodes glareolus</i> | ++   | neg  | nd         |
| Germany | KS10/1128  | Weissach         | <i>Myodes glareolus</i> | ++   | neg  | nd         |
| Germany | KS12/1688  | Weissach         | <i>Myodes glareolus</i> | ++   | neg  | nd         |
| Germany | KS10/1126  | Weissach         | <i>Myodes glareolus</i> | ++   | neg  | nd         |
| Germany | KS10/1142  | Weissach         | <i>Myodes glareolus</i> | ++   | neg  | nd         |
| Germany | KS10/1099  | Weissach         | <i>Myodes glareolus</i> | ++   | neg  | nd         |
| Germany | KS12/1702  | Weissach         | <i>Myodes glareolus</i> | ++   | neg  | nd         |
| Germany | KS10/1025  | Weissach         | <i>Myodes glareolus</i> | ++   | neg  | nd         |
| Germany | KS12/1696  | Weissach         | <i>Myodes glareolus</i> | ++   | neg  | nd         |
| Germany | KS10/0986  | Weissach         | <i>Myodes glareolus</i> | ++   | neg  | nd         |
| Germany | KS10/1855  | Weissach         | <i>Myodes glareolus</i> | ++   | neg  | nd         |
| Germany | KS10/1846  | Weissach         | <i>Myodes glareolus</i> | ++   | neg  | nd         |
| Germany | KS10/1926  | Weissach         | <i>Myodes glareolus</i> | ++   | neg  | nd         |
| Germany | KS10/1007  | Weissach         | <i>Myodes glareolus</i> | ++   | neg  | nd         |
| Germany | KS10/3472  | Weissach         | <i>Myodes glareolus</i> | ++   | neg  | nd         |
| Germany | KS10/3558  | Weissach         | <i>Myodes glareolus</i> | ++   | neg  | nd         |
| Germany | KS10/1089  | Weissach         | <i>Myodes glareolus</i> | ++   | neg  | nd         |
| Germany | KS10/1065  | Weissach         | <i>Myodes glareolus</i> | ++   | neg  | nd         |
| Germany | KS10/1109  | Weissach         | <i>Myodes glareolus</i> | ++   | neg  | nd         |
| Germany | KS10/1038  | Weissach         | <i>Myodes glareolus</i> | ++   | neg  | nd         |
| Germany | KS10/1055  | Weissach         | <i>Myodes glareolus</i> | ++   | neg  | nd         |
| Germany | KS10/0981  | Weissach         | <i>Myodes glareolus</i> | ++   | neg  | nd         |
| Germany | KS12/1740  | Weissach         | <i>Myodes glareolus</i> | ++   | neg  | nd         |
| Germany | KS10/0997  | Weissach         | <i>Myodes glareolus</i> | ++   | neg  | nd         |
| Germany | KS10/1093  | Weissach         | <i>Myodes glareolus</i> | ++   | neg  | nd         |
| Germany | KS12/1768  | Weissach         | <i>Myodes glareolus</i> | +++  | neg  | nd         |
| Germany | KS12/1724  | Weissach         | <i>Myodes glareolus</i> | +++  | +++  | nd         |
| Germany | KS12/1684  | Weissach         | <i>Myodes glareolus</i> | +++  | neg  | nd         |
| Germany | KS12/1719  | Weissach         | <i>Myodes glareolus</i> | +++  | neg  | nd         |
| Germany | KS12/1682  | Weissach         | <i>Myodes glareolus</i> | ++   | neg  | nd         |
| Germany | KS12/1769  | Weissach         | <i>Myodes glareolus</i> | ++   | neg  | nd         |
| Germany | KS10/1035  | Weissach         | <i>Myodes glareolus</i> | neg  | ++++ | nd         |
| Germany | KS12/1698  | Weissach         | <i>Myodes glareolus</i> | neg  | ++   | nd         |
| Germany | KS12/1700  | Weissach         | <i>Myodes glareolus</i> | neg  | +    | nd         |
| Germany | KS11/1428  | Wolbrechtshausen | <i>Myodes glareolus</i> | +++  | neg  | nd         |

|               |            |                            |                         |      |      |         |
|---------------|------------|----------------------------|-------------------------|------|------|---------|
| Germany       | 258/05     | Wolfertschlag, Eppenschlag | <i>Myodes glareolus</i> | neg  | ++++ | nd      |
| Finland       | 49100611   | Pallasjarvi                | <i>Myodes rutilus</i>   | neg  | +++  | Ural    |
| France        | NCHA000246 | Cormaranche-en-Bugey       | <i>Myodes glareolus</i> | ++++ | ++   | nd      |
| France        | NCHA000271 | Cormaranche-en-Bugey       | <i>Myodes glareolus</i> | ++++ | neg  | nd      |
| France        | NCHA000250 | Cormaranche-en-Bugey       | <i>Myodes glareolus</i> | ++++ | neg  | nd      |
| France        | NCHA000272 | Cormaranche-en-Bugey       | <i>Myodes glareolus</i> | ++++ | neg  | nd      |
| France        | NCHA000241 | Cormaranche-en-Bugey       | <i>Myodes glareolus</i> | ++++ | neg  | nd      |
| France        | NCHA000263 | Cormaranche-en-Bugey       | <i>Myodes glareolus</i> | ++++ | neg  | nd      |
| France        | NCHA000278 | Cormaranche-en-Bugey       | <i>Myodes glareolus</i> | ++++ | ++   | nd      |
| France        | NCHA000269 | Cormaranche-en-Bugey       | <i>Myodes glareolus</i> | ++++ | neg  | nd      |
| France        | NCHA000264 | Cormaranche-en-Bugey       | <i>Myodes glareolus</i> | ++++ | neg  | nd      |
| France        | NCHA000244 | Cormaranche-en-Bugey       | <i>Myodes glareolus</i> | +++  | ++   | Western |
| France        | NCHA000252 | Cormaranche-en-Bugey       | <i>Myodes glareolus</i> | +++  | neg  | nd      |
| France        | NCHA000262 | Cormaranche-en-Bugey       | <i>Myodes glareolus</i> | +++  | neg  | nd      |
| France        | NCHA000235 | Cormaranche-en-Bugey       | <i>Myodes glareolus</i> | neg  | +++  | nd      |
| France        | NCHA000275 | Cormaranche-en-Bugey       | <i>Myodes glareolus</i> | neg  | ++   | nd      |
| France        | NCHA000412 | La Venotiere               | <i>Myodes glareolus</i> | ++++ | neg  | nd      |
| France        | NCHA000410 | La Venotiere               | <i>Myodes glareolus</i> | ++++ | +++  | nd      |
| France        | NCHA000401 | La Venotiere               | <i>Myodes glareolus</i> | ++++ | neg  | nd      |
| France        | NCHA000389 | La Venotiere               | <i>Myodes glareolus</i> | ++++ | +++  | nd      |
| France        | NCHA000382 | La Venotiere               | <i>Myodes glareolus</i> | ++++ | neg  | nd      |
| France        | NCHA000385 | La Venotiere               | <i>Myodes glareolus</i> | ++++ | neg  | Western |
| France        | NCHA000383 | La Venotiere               | <i>Myodes glareolus</i> | ++++ | neg  | nd      |
| France        | NCHA000393 | La Venotiere               | <i>Myodes glareolus</i> | ++++ | neg  | nd      |
| France        | NCHA000409 | La Venotiere               | <i>Myodes glareolus</i> | ++   | ++++ | nd      |
| France        | NCHA000403 | La Venotiere               | <i>Myodes glareolus</i> | ++   | +++  | nd      |
| France        | NCHA000416 | La Venotiere               | <i>Myodes glareolus</i> | neg  | ++++ | nd      |
| France        | NCHA000396 | La Venotiere               | <i>Myodes glareolus</i> | neg  | ++++ | nd      |
| France        | NCHA000391 | La Venotiere               | <i>Myodes glareolus</i> | neg  | +++  | nd      |
| France        | NCHA000103 | Mignovillard               | <i>Myodes glareolus</i> | ++++ | neg  | Western |
| France        | NCHA000105 | Mignovillard               | <i>Myodes glareolus</i> | ++++ | ++   | nd      |
| France        | NCHA000124 | Mignovillard               | <i>Myodes glareolus</i> | ++++ | neg  | nd      |
| France        | NCHA000127 | Mignovillard               | <i>Myodes glareolus</i> | ++++ | neg  | nd      |
| France        | NCHA000106 | Mignovillard               | <i>Myodes glareolus</i> | ++++ | neg  | nd      |
| France        | NCHA000130 | Mignovillard               | <i>Myodes glareolus</i> | ++++ | ++++ | nd      |
| France        | NCHA000113 | Mignovillard               | <i>Myodes glareolus</i> | +++  | neg  | nd      |
| France        | NCHA000132 | Mignovillard               | <i>Myodes glareolus</i> | +++  | neg  | nd      |
| France        | NCHA000090 | Mignovillard               | <i>Myodes glareolus</i> | ++   | ++++ | nd      |
| France        | NCHA000094 | Mignovillard               | <i>Myodes glareolus</i> | neg  | ++   | nd      |
| France        | NCHA000129 | Mignovillard               | <i>Myodes glareolus</i> | neg  | ++   | nd      |
| France        | NCHA000010 | Mont-sous-Vaudrey          | <i>Myodes glareolus</i> | ++++ | neg  | Western |
| France        | NCHA000043 | Mont-sous-Vaudrey          | <i>Myodes glareolus</i> | ++++ | ++   | nd      |
| France        | NCHA000019 | Mont-sous-Vaudrey          | <i>Myodes glareolus</i> | ++++ | neg  | nd      |
| France        | NCHA000011 | Mont-sous-Vaudrey          | <i>Myodes glareolus</i> | ++++ | +++  | Western |
| France        | NCHA000004 | Mont-sous-Vaudrey          | <i>Myodes glareolus</i> | ++++ | neg  | nd      |
| France        | NCHA000014 | Mont-sous-Vaudrey          | <i>Myodes glareolus</i> | ++++ | neg  | nd      |
| France        | NCHA000026 | Mont-sous-Vaudrey          | <i>Myodes glareolus</i> | ++++ | neg  | nd      |
| France        | NCHA000025 | Mont-sous-Vaudrey          | <i>Myodes glareolus</i> | ++++ | neg  | Western |
| France        | NCHA000041 | Mont-sous-Vaudrey          | <i>Myodes glareolus</i> | +++  | neg  | nd      |
| France        | NCHA000347 | Vouzon                     | <i>Myodes glareolus</i> | ++++ | neg  | Western |
| France        | NCHA000346 | Vouzon                     | <i>Myodes glareolus</i> | ++++ | ++++ | nd      |
| France        | NCHA000373 | Vouzon                     | <i>Myodes glareolus</i> | ++++ | neg  | nd      |
| France        | NCHA000350 | Vouzon                     | <i>Myodes glareolus</i> | ++++ | ++++ | nd      |
| France        | NCHA000374 | Vouzon                     | <i>Myodes glareolus</i> | ++++ | +++  | nd      |
| France        | NCHA000380 | Vouzon                     | <i>Myodes glareolus</i> | ++++ | +++  | nd      |
| France        | NCHA000366 | Vouzon                     | <i>Myodes glareolus</i> | +++  | ++++ | nd      |
| France        | NCHA000341 | Vouzon                     | <i>Myodes glareolus</i> | ++   | ++++ | nd      |
| France        | NCHA000361 | Vouzon                     | <i>Myodes glareolus</i> | neg  | ++++ | nd      |
| France        | NCHA000356 | Vouzon                     | <i>Myodes glareolus</i> | neg  | +++  | nd      |
| France        | NCHA000359 | Vouzon                     | <i>Myodes glareolus</i> | neg  | +++  | nd      |
| France        | NCHA000372 | Vouzon                     | <i>Myodes glareolus</i> | neg  | ++   | nd      |
| France        | NCHA000370 | Vouzon                     | <i>Myodes glareolus</i> | neg  | ++   | nd      |
| France        | NCHA000376 | Vouzon                     | <i>Myodes glareolus</i> | neg  | ++   | nd      |
| Great Britain | KS15/511   | Cumbria                    | <i>Myodes glareolus</i> | neg  | ++++ | nd      |
| Great Britain | KS15/510   | Cumbria                    | <i>Myodes glareolus</i> | neg  | +++  | nd      |
| Great Britain | KS15/531   | Pentland Hills             | <i>Myodes glareolus</i> | neg  | ++   | nd      |
| Great Britain | KS15/533   | Pentland Hills             | <i>Myodes glareolus</i> | neg  | ++   | nd      |
| Great Britain | KS15/526   | Pentland Hills             | <i>Myodes glareolus</i> | neg  | ++   | nd      |
| Italy         | 74F27B6    | Trento                     | <i>Myodes glareolus</i> | ++++ | neg  | Western |
| Italy         | 74F0610    | Trento                     | <i>Myodes glareolus</i> | ++++ | neg  | nd      |
| Italy         | 74FD0F2    | Trento                     | <i>Myodes glareolus</i> | ++++ | neg  | Western |
| Italy         | 728E6E8    | Trento                     | <i>Myodes glareolus</i> | neg  | ++   | nd      |
| Italy         | 74F3312    | Trento                     | <i>Myodes glareolus</i> | neg  | (+)  | nd      |



|                 |            |                |                         |      |      |            |
|-----------------|------------|----------------|-------------------------|------|------|------------|
| The Netherlands | 12-1593    | Nutter         | <i>Myodes glareolus</i> | ++++ | neg  | nd         |
| The Netherlands | 13-1760    | Nutter         | <i>Myodes glareolus</i> | ++++ | neg  | nd         |
| The Netherlands | 12-1640    | Nutter         | <i>Myodes glareolus</i> | ++++ | ++   | nd         |
| The Netherlands | 12-1580    | Nutter         | <i>Myodes glareolus</i> | ++++ | ++   | nd         |
| The Netherlands | 12-1605    | Nutter         | <i>Myodes glareolus</i> | ++++ | neg  | nd         |
| The Netherlands | 13-1758    | Nutter         | <i>Myodes glareolus</i> | ++++ | neg  | nd         |
| The Netherlands | 12-1648    | Nutter         | <i>Myodes glareolus</i> | ++++ | neg  | nd         |
| The Netherlands | 13-1759    | Nutter         | <i>Myodes glareolus</i> | ++++ | neg  | nd         |
| The Netherlands | 13-1740    | Nutter         | <i>Myodes glareolus</i> | ++++ | neg  | Western    |
| The Netherlands | 12-1578    | Nutter         | <i>Myodes glareolus</i> | ++++ | neg  | nd         |
| The Netherlands | 13-1761    | Nutter         | <i>Myodes glareolus</i> | +    | neg  | nd         |
| The Netherlands | 12-1632    | Nutter         | <i>Myodes glareolus</i> | neg  | ++   | nd         |
| The Netherlands | 12-1629    | Nutter         | <i>Myodes glareolus</i> | neg  | +    | nd         |
| Austria         | Mu/08/1298 | Laa a.d. Thaya | <i>Myodes glareolus</i> | ++++ | ++   | Carpathian |
| Austria         | Mu/08/1241 | Laa a.d. Thaya | <i>Myodes glareolus</i> | ++++ | neg  | nd         |
| Austria         | Mu/08/1264 | Laa a.d. Thaya | <i>Myodes glareolus</i> | +++  | neg  | nd         |
| Austria         | Mu/08/1265 | Laa a.d. Thaya | <i>Myodes glareolus</i> | neg  | ++++ | nd         |
| Austria         | Mu/08/1221 | Laa a.d. Thaya | <i>Myodes glareolus</i> | neg  | ++++ | nd         |
| Austria         | Mu/08/1266 | Laa a.d. Thaya | <i>Myodes glareolus</i> | neg  | ++++ | nd         |
| Austria         | Mu/08/1290 | Laa a.d. Thaya | <i>Myodes glareolus</i> | neg  | ++++ | nd         |
| Austria         | Mu/08/1220 | Laa a.d. Thaya | <i>Myodes glareolus</i> | neg  | ++++ | nd         |
| Austria         | Mu/08/1288 | Laa a.d. Thaya | <i>Myodes glareolus</i> | neg  | ++++ | nd         |
| Austria         | Mu/08/1302 | Laa a.d. Thaya | <i>Myodes glareolus</i> | neg  | ++++ | nd         |
| Austria         | Mu/08/1238 | Laa a.d. Thaya | <i>Myodes glareolus</i> | neg  | +++  | nd         |
| Austria         | Mu/08/1285 | Laa a.d. Thaya | <i>Myodes glareolus</i> | neg  | +++  | nd         |
| Poland          | KS13/863   | Dobskie Lake   | <i>Myodes glareolus</i> | neg  | +    | Eastern    |
| Sweden          | 76         | Grimsö         | <i>Myodes glareolus</i> | neg  | ++   | nd         |
| Sweden          | 61         | Grimsö         | <i>Myodes glareolus</i> | neg  | ++   | nd         |
| Sweden          | 63         | Grimsö         | <i>Myodes glareolus</i> | neg  | ++   | nd         |
| Sweden          | 71         | Grimsö         | <i>Myodes glareolus</i> | neg  | +    | nd         |
| Sweden          | 323        | Haparanda      | <i>Myodes glareolus</i> | neg  | ++   | nd         |
| Sweden          | 322        | Haparanda      | <i>Myodes glareolus</i> | neg  | ++   | nd         |
| Sweden          | 166        | Harads         | <i>Myodes glareolus</i> | neg  | ++++ | nd         |
| Sweden          | 168        | Harads         | <i>Myodes glareolus</i> | neg  | ++++ | nd         |
| Sweden          | 163        | Harads         | <i>Myodes glareolus</i> | neg  | +++  | nd         |
| Sweden          | 403        | Öster Malma    | <i>Myodes glareolus</i> | neg  | ++++ | nd         |
| Sweden          | 106        | Umea           | <i>Myodes glareolus</i> | neg  | ++   | Ural       |
| Sweden          | 109        | Umea           | <i>Myodes glareolus</i> | neg  | ++   | Ural       |
| Sweden          | 425        | Växjö          | <i>Myodes glareolus</i> | neg  | ++++ | nd         |
| Sweden          | 412        | Växjö          | <i>Myodes glareolus</i> | neg  | ++++ | nd         |
| Sweden          | 419        | Växjö          | <i>Myodes glareolus</i> | neg  | ++++ | nd         |
| Sweden          | 438        | Växjö          | <i>Myodes glareolus</i> | neg  | ++   | nd         |
| Sweden          | 52         | Vindeln        | <i>Myodes glareolus</i> | neg  | ++   | nd         |
| Slovakia        | 178        | Bratislava     | <i>Myodes glareolus</i> | ++++ | neg  | nd         |
| Slovakia        | 140        | Bratislava     | <i>Myodes glareolus</i> | ++++ | neg  | nd         |
| Slovakia        | 4          | Bratislava     | <i>Myodes glareolus</i> | ++++ | ++++ | nd         |
| Slovakia        | 144        | Bratislava     | <i>Myodes glareolus</i> | ++++ | neg  | nd         |
| Slovakia        | 146        | Bratislava     | <i>Myodes glareolus</i> | +++  | neg  | nd         |
| Slovakia        | 78         | Bratislava     | <i>Myodes glareolus</i> | +++  | neg  | nd         |
| Slovakia        | 185        | Bratislava     | <i>Myodes glareolus</i> | +++  | neg  | nd         |
| Slovakia        | 173        | Bratislava     | <i>Myodes glareolus</i> | +++  | neg  | nd         |
| Slovakia        | 150        | Bratislava     | <i>Myodes glareolus</i> | neg  | ++++ | nd         |
| Slovakia        | 77         | Bratislava     | <i>Myodes glareolus</i> | neg  | ++++ | nd         |
| Slovakia        | 62         | Bratislava     | <i>Myodes glareolus</i> | neg  | ++++ | Western    |
| Slovakia        | 57         | Bratislava     | <i>Myodes glareolus</i> | neg  | ++++ | nd         |
| Slovakia        | 17         | Bratislava     | <i>Myodes glareolus</i> | neg  | ++++ | nd         |
| Slovakia        | 101        | Bratislava     | <i>Myodes glareolus</i> | neg  | +++  | nd         |
| Slovakia        | 154        | Bratislava     | <i>Myodes glareolus</i> | neg  | +++  | nd         |
| Slovakia        | 152        | Bratislava     | <i>Myodes glareolus</i> | neg  | +    | nd         |
| Slovakia        | 114        | Fugelka        | <i>Myodes glareolus</i> | ++++ | neg  | nd         |
| Slovakia        | 137        | Fugelka        | <i>Myodes glareolus</i> | ++++ | ++++ | Carpathian |
| Slovakia        | 133        | Fugelka        | <i>Myodes glareolus</i> | ++++ | neg  | nd         |
| Slovakia        | 125        | Fugelka        | <i>Myodes glareolus</i> | +++  | neg  | nd         |
| Slovakia        | 216        | Fugelka        | <i>Myodes glareolus</i> | +++  | neg  | nd         |
| Slovakia        | 217        | Fugelka        | <i>Myodes glareolus</i> | +++  | ++++ | nd         |
| Slovakia        | 220        | Fugelka        | <i>Myodes glareolus</i> | +++  | neg  | nd         |
| Slovakia        | 117        | Fugelka        | <i>Myodes glareolus</i> | ++   | neg  | nd         |
| Slovakia        | 13         | Fugelka        | <i>Myodes glareolus</i> | ++   | +++  | nd         |
| Slovakia        | 124        | Fugelka        | <i>Myodes glareolus</i> | +    | neg  | nd         |
| Slovakia        | 2          | Fugelka        | <i>Myodes glareolus</i> | neg  | ++++ | nd         |
| Slovakia        | 1          | Fugelka        | <i>Myodes glareolus</i> | neg  | ++++ | nd         |
| Slovakia        | 219        | Fugelka        | <i>Myodes glareolus</i> | neg  | ++++ | nd         |
| Slovakia        | 16         | Fugelka        | <i>Myodes glareolus</i> | neg  | +++  | nd         |

|          |       |            |                         |      |      |         |
|----------|-------|------------|-------------------------|------|------|---------|
| Slovakia | 22869 | Rozhanovce | <i>Myodes glareolus</i> | ++++ | ++++ | nd      |
| Slovakia | 22867 | Rozhanovce | <i>Myodes glareolus</i> | ++++ | neg  | nd      |
| Slovakia | 22453 | Rozhanovce | <i>Myodes glareolus</i> | ++++ | neg  | nd      |
| Slovakia | 22596 | Rozhanovce | <i>Myodes glareolus</i> | +++  | ++++ | nd      |
| Slovakia | 22505 | Rozhanovce | <i>Myodes glareolus</i> | +++  | ++++ | nd      |
| Slovakia | 22455 | Rozhanovce | <i>Myodes glareolus</i> | ++   | +++  | nd      |
| Slovakia | 22568 | Rozhanovce | <i>Myodes glareolus</i> | neg  | ++++ | nd      |
| Slovakia | 22600 | Rozhanovce | <i>Myodes glareolus</i> | neg  | ++++ | Eastern |
| Slovakia | 22598 | Rozhanovce | <i>Myodes glareolus</i> | neg  | +++  | nd      |
| Slovakia | 22866 | Rozhanovce | <i>Myodes glareolus</i> | neg  | +++  | nd      |
| Slovakia | 22864 | Rozhanovce | <i>Myodes glareolus</i> | neg  | +++  | nd      |
| Slovakia | 22533 | Rozhanovce | <i>Myodes glareolus</i> | neg  | ++   | nd      |

++++, ct-values 20-25; +++, ct-values 25-30; ++, ct-values 30-35; +, ct-values 35-40; (+), borderline positive result (ct-values 40.46 and 41.13); neg, no viral RNA was detected; nd, not determined

**Table S3:** Nucleotide (nt) and amino acid (aa) sequence identity of BvHV sequences to sequences of the same trapping site and to reference sequences of species *Hepacivirus J* and *Hepacivirus F*.

|                      | Trapping site        | % nt / aa identity within trapping site and same clade | % nt / aa identity within trapping site between clades | % nt / aa identity with reference KC411777 <i>Hepacivirus J</i> | % nt / aa identity with reference KC411784 <i>Hepacivirus F</i> |
|----------------------|----------------------|--------------------------------------------------------|--------------------------------------------------------|-----------------------------------------------------------------|-----------------------------------------------------------------|
| <i>Hepacivirus J</i> | Laa an der Thaya     | - / -                                                  | - / -                                                  | 83.01 / 98.69                                                   | 55.12 / 54.25                                                   |
|                      | Cormaranche en Bugey | 94.55 / 100                                            | - / -                                                  | 84.31-86.06 / 98.69                                             | 57.30-57.73 / 54.25                                             |
|                      | La Venotiere         | 84.53-89.32 / 98.69-99.35                              | - / -                                                  | 81.92-83.88 / 96.39-96.73                                       | 54.25-53.81 / 52.94                                             |
|                      | Mignovillard         | 83.22-100 / 96.73-100                                  | - / -                                                  | 83.88-86.71 / 96.73-97.39                                       | 53.81-55.77 / 52.94-53.59                                       |
|                      | Mont sous Vaudrey    | 87.36-94.12 / 95.42-100                                | - / -                                                  | 82.35-86.49 / 95.42-98.69                                       | 54.25-56.43 / 52.94-54.25                                       |
|                      | Vouzon               | - / -                                                  | - / -                                                  | 81.48 / 95.42                                                   | 53.59 / 51.63                                                   |
|                      | Jasnitz              | - / -                                                  | - / -                                                  | 84.53 / 98.04                                                   | 54.03 / 54.25                                                   |
|                      | Osnabrück            | 85.84 / 99.35                                          | - / -                                                  | 82.14-84.31 / 97.39-98.04                                       | 54.90-55.34 / 54.25-54.90                                       |
|                      | Schreivendorf        | - / -                                                  | - / -                                                  | 84.10 / 98.04                                                   | 55.34 / 54.25                                                   |
|                      | Trento               | 90.85-99.35 / 99.35-100                                | - / -                                                  | 83.66-84.75 / 98.04                                             | 55.12-56.21 / 54.25-54.90                                       |
|                      | Nutter               | 94.77-100 / 100                                        | - / -                                                  | 84.75-85.19 / 98.69                                             | 54.90-55.34 / 54.25                                             |
|                      | Bratislava           | 90.20-91.94 / 98.04-100                                | 56.21-57.52 / 55.56                                    | 80.39-82.57 / 97.39-98.69                                       | 54.03-57.52 / 54.25                                             |
|                      | Rozhanovce           | - / -                                                  | 53.59-53.81 / 55.56                                    | 83.88 / 98.69                                                   | 54.47 / 54.25                                                   |
|                      | Fugelka              | 88.89-99.35 / 98.69-100                                | - / -                                                  | 79.74-81.92 / 98.04-98.69                                       | 54.90-56.21 / 54.25-54.90                                       |
| <i>Hepacivirus F</i> | Hangenleithen        | - / -                                                  | - / -                                                  | 53.81 / 55.56                                                   | 79.08 / 94.77                                                   |
|                      | Mühlberg             | - / -                                                  | - / -                                                  | 55.56 / 55.56                                                   | 79.30 / 95.42                                                   |
|                      | Raimundsreuth        | - / -                                                  | - / -                                                  | 53.81 / 55.56                                                   | 79.74 / 95.42                                                   |
|                      | Rothemühl            | 99.35 / 98.69                                          | - / -                                                  | 53.16-53.38 / 78.65-79.08                                       | 78.65-79.08 / 92.16-93.46                                       |
|                      | Tussenhausen         | - / -                                                  | - / -                                                  | 53.16 / 55.56                                                   | 77.12 / 93.46                                                   |
|                      | Bratislava           | - / -                                                  | 56.2-57.5 / 55.56                                      | 55.77 / 55.56                                                   | 81.05 / 94.77                                                   |
|                      | Rozhanovce           | 95.86 / 99.35                                          | 53.59-53.81 / 55.56                                    | 52.29-52.51 / 55.56                                             | 79.96-80.17 / 95.42-96.08                                       |

- / -, only one sequence of this species at the trapping site.

1. Drexler, J.F.; Corman, V.M.; Müller, M.A.; Lukashev, A.; Gmyl, A.; Coutard, B.; Adam, A.; Ritz, D.; Leijten, L.M.; Van Riel, D. et al. Evidence for novel hepaciviruses in rodents. PLoS Pathog. 2013;9(6):e1003438 DOI: 10.1371/journal.ppat.1003438.
2. Röhrs, S.; Begeman, L.; Straub, B.K.; Boadella, M.; Hanke, D.; Drewes, S.; Hoffmann, B.; Keller, M.; Drexler, J.F.; Drosten, C. et al. The bank vole (*Clethrionomys glareolus*) - small animal model for hepacivirus infection. submitted.
3. Hoffmann, B.; Depner, K.; Schirrmeier, H.; Beer, M. A universal heterologous internal control system for duplex real-time RT-PCR assays used in a detection system for pestiviruses. J Virol Methods. 2006;136(1-2):200-9 DOI: 10.1016/j.jviromet.2006.05.020.
